# Supplementary material for: A simple, general route to 2-pyridylidene transition metal complexes
Source: Royal Society of Chemistry journal article supplement (doi:10.1039/c0cc03935g), 2010-01-01
Supplement: c0cc03935g.pdf [file c0cc03935g.pdf]

*Supporting information for the paper:*

## **A Simple, General Route to 2-Pyridylidene Transition Metal Complexes**

Marta Roselló-Merino,<sup>†</sup> Josefina Díez,<sup>‡</sup> Salvador Conejero,<sup>\*,†</sup>

<sup>†</sup>*Instituto de Investigaciones Químicas, Departamento de Química Inorgánica, CSIC, Universidad de Sevilla, Avda. Américo Vespucio no 49, 41092 Sevilla, Spain.*

<sup>‡</sup>*Departamento de Química Orgánica e Inorgánica, Universidad de Oviedo, C/ Julián Clavería 8, 33006 Oviedo, Spain*

*Contents:*

- 1. General.**
- 2. Synthesis and spectroscopic and analytical data for new compounds.**
- 3. Table S.1.** Crystal data and structure refinement for compound **3b**.
- 4. Table S.2.** Crystal data and structure refinement for compound **5b**.

Crystallographic data are also deposited with Cambridge Crystallographic Data Centre. Copies of the data (**3b**, **5b**: CCDC 791629 and 791630) can be obtained free of charge via [www.ccdc.cam.ac.uk/data\\_request/cif](http://www.ccdc.cam.ac.uk/data_request/cif), by e-mailing [data\\_request@ccdc.cam.ac.uk](mailto:data_request@ccdc.cam.ac.uk), or by contacting Cambridge Crystallographic Data Centre, 12, Union Road, Cambridge CD 1EZ, UK; fax +44 1223 336033.

**General.** Microanalyses were performed by the Microanalytical Service of the Instituto de Investigaciones Químicas (Sevilla, Spain). Infrared spectra were obtained from Bruker Vector 22 spectrometer. The NMR instruments were Bruker DRX-500, DRX-400 and DPX-300 spectrometers. Spectra were referenced to external SiMe<sub>4</sub> ( $\delta$  0 ppm) using the residual protio solvent peaks as internal standards (<sup>1</sup>H NMR experiments) or the characteristic resonances of the solvent nuclei (<sup>13</sup>C NMR experiments). Spectral assignments were made by routine one- and two-dimensional NMR experiments where appropriate. All manipulations were performed under dry, oxygen-free argon, following conventional Schlenk techniques. 3-methylpyridine-2-carboxylic acid was purchased

from Apollo Scientific. N-methyl-2-carboxypyridinium betaine **1a**,<sup>1</sup> [RhCl(cod)],<sup>2</sup> [IrCl(cod)],<sup>3</sup> [AuCl(SMe<sub>2</sub>)]<sup>4</sup> and [PtCl<sub>2</sub>(dmsO)<sub>2</sub>]<sup>5</sup> were prepared according to literature procedures. Pyridinium 2-carboxylate **1c** has been prepared following Katritzky's procedure.<sup>6</sup>

## 2. Synthesis and spectroscopic and analytical data for new compounds.

### Synthesis of 1,3-dimethyl-2-carboxypyridine (**1b**)

400 mg (3.6 mmol) of Na<sub>2</sub>CO<sub>3</sub> are added to a solution of 1g (7.3 mmol) of 3-methylpyridine-2-carboxylic acid in 5 mL of methanol. The mixture is stirred at room temperature for 1.5 hours to yield a colorless solution that is then cooled to -60 °C and treated with 880 μL (7.3 mmol) of methyl triflate. After 30 minutes the solution is brought to room temperature and the solvent is removed *in vacuo*. The resulting white solid, which contains sodium triflate, is charged on a 10x2 cm silica gel column, the salt being eluted with acetone (100 mL) and the carboxypyridine **1b** with a CH<sub>2</sub>Cl<sub>2</sub>/methanol 1:1 mixture. Solvent is removed *in vacuo* to yield 930 mg (84% yield) of a white highly hygroscopic solid. This compound is dissolved in the minimum amount of methanol and dried with activated molecular sieves for a period of two days to remove all traces of water. The solvent is then removed *in vacuo* and the white solid stored in a glove-box.

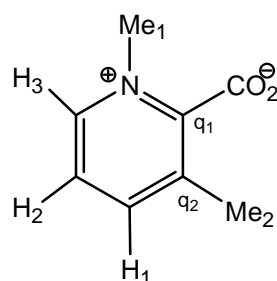

**IR (nujol):**  $\nu$ (CO<sub>2</sub>) 1640 cm<sup>-1</sup>.

**<sup>1</sup>H NMR** (400 MHz, d<sub>6</sub>-dmsO):  $\delta$  = 8.55 (d, 1H, <sup>3</sup>J<sub>HH</sub> = 6.2, H<sub>3</sub>), 8.28 (d, 1H, <sup>3</sup>J<sub>HH</sub> = 7.7, H<sub>1</sub>), 7.72 (dd, 1H, <sup>3</sup>J<sub>HH</sub> = 7.7 and 6.2 Hz, H<sub>2</sub>), 4.16 (s, 3H, N-Me), 2.37 (s, 3H, C-Me).  
**<sup>13</sup>C {<sup>1</sup>H} NMR** (100 MHz, d<sub>6</sub>-dmsO):  $\delta$  = 161.5 (CO<sub>2</sub>), 155.9 (C<sub>q1</sub>), 145.5 (CH<sup>2</sup>), 141.1 (CH<sup>3</sup>), 132.7 (CH<sup>1</sup>), 123.6 (C<sub>q2</sub>), 45. (N-Me), 17.65 (Me).

<sup>1</sup> H Quast and E. Schmitt, *Liebigs Ann. Chem.*, 1970, **732**, 64.

<sup>2</sup> G. Giordano and R.H.Crabtree, *Inorg. Synth.*, 1990, **28**, 88.

<sup>3</sup> J.L. Herde, L.C. Lambert and C.V. Senoff, *Inorg. Synth.*, 1974, **15**, 18.

<sup>4</sup> T.N. Hooper, C.P. Butts, M. Green, M.F. Haddow, J.E. McGrady and C.A. Russell, *Chem.–Eur.J.*, 2009, **15**, 12196.

<sup>5</sup> V.Y. Kukushkin, A.J.L. Pombeiro, C.M.P. Ferreira and L.I. Elding, *Inorg. Synth.*, 2002, **33**, 192.

<sup>6</sup> A.R. Katritzky, R. Awartani and R.C. Patel, *J. Org. Chem.*, 1982, **47**, 498.

Anal. Calcd for C<sub>8</sub>H<sub>9</sub>NO<sub>2</sub>: C, 63.56; H, 6.00; N, 9.27. Found: C, 63.2; H, 5.9; N, 9.3.

### Synthesis of complex **2a**.

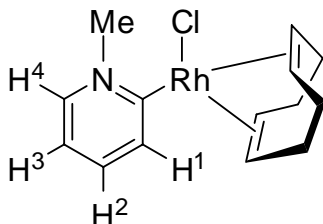

A suspension of 40 mg (0.29 mmol) of N-methyl-2-carboxypyridine, **1a**, and 72 mg (0.15 mmol) of [RhCl(cod)]<sub>2</sub> in 2 mL of dry THF is heated at 65°C for 2 hours under inert atmosphere. The dark red solution is filtered *via* cannula. Addition of 5 mL of pentane to the resulting solution yields a yellow precipitate that is further washed with 2 mL of pentane. The solid is dried *in vacuo* to yield 69 mg of **2a** (70% yield).

<sup>1</sup>H NMR (500 MHz, CDCl<sub>3</sub>): δ = 8.15 (d, 1H, <sup>3</sup>J<sub>HH</sub> = 8.4 Hz, H<sup>1</sup>), 8.00 (d, 1H, <sup>3</sup>J<sub>HH</sub> = 6.4 Hz, H<sup>4</sup>), 7.22 (dd, 1H, <sup>3</sup>J<sub>HH</sub> = 8.4 and 6.4 Hz, H<sup>2</sup>), 6.91 (m, 1H, H<sup>3</sup>), 5.00 (m, 2H, =CH<sub>cod</sub>), 4.80 (s, 3H, N-Me), 3.24 (m, 1H, =CH<sub>cod</sub>), 3.11 (m, 1H, =CH<sub>cod</sub>), 2.52-2.22 (m, 4H, CH<sub>2</sub>), 2.05-1.84 (m, 4H, CH<sub>2</sub>). <sup>13</sup>C {<sup>1</sup>H} NMR (125 MHz, CDCl<sub>3</sub>): δ = 216.6 (d, <sup>1</sup>J<sub>RhC</sub> = 43 Hz, Rh=C), 142.2 (CH<sup>4</sup>), 139.0 (CH<sup>1</sup>), 131.6 (CH<sup>2</sup>), 118.5 (CH<sup>3</sup>), 99.5, 99.4 (d, <sup>1</sup>J<sub>RhC</sub> = 5 Hz, =CH), 71.4, 66.0 (d, <sup>1</sup>J<sub>RhC</sub> = 15 Hz, =CH), 52.9 (N-Me), 33.4, 32.3, 29.0, 28.4 (CH<sub>2</sub>).

Anal. Calcd for C<sub>14</sub>H<sub>19</sub>ClNRh: C, 49.50; H, 5.64; N, 4.12. Found: C, 49.8; H, 6.0; N, 4.0.

### Synthesis of complex **3a**.

A suspension of 40 mg (0.29 mmol) of N-methyl-2-carboxypyridine and 98 mg (0.15 mmol) of [IrCl(cod)]<sub>2</sub> in 2 mL of dry THF is heated at 65 °C for 2 hours under inert atmosphere. The resulting dark red solution is filtered *via* cannula and mixed with 5 mL of pentane, yielding a yellow precipitate that is further washed with 2 mL of pentane. The solid is dried *in vacuo* to yield 105 mg of **2b** (0.24 mmol, 84% yield).

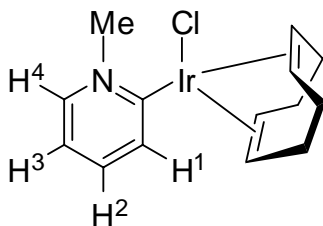

**$^1\text{H}$  NMR** (500 MHz,  $\text{CDCl}_3$ ):  $\delta$  = 8.01 (d, 1H,  $^3J_{\text{HH}} = 8.4$  Hz,  $\text{H}^4$ ), 7.98 (d, 1H,  $^3J_{\text{HH}} = 7.3$  Hz,  $\text{H}^1$ ), 7.37 (dd, 1H,  $^3J_{\text{HH}} = 8.4$  and 7.3 Hz,  $\text{H}^2$ ), 6.90 (dd, 1H,  $^3J_{\text{HH}} = 8.4$  and 7.3 Hz,  $\text{H}^3$ ), 4.63 (m, 1H,  $=\text{CH}_{\text{cod}}$ ), 4.59 (m, 1H,  $=\text{CH}_{\text{cod}}$ ), 4.58 (s, 3H, N-Me), 2.88 (m, 1H,  $=\text{CH}_{\text{cod}}$ ), 2.78 (m, 1H,  $=\text{CH}_{\text{cod}}$ ), 3.32 (m, 2H,  $\text{CH}_2$ ), 2.19 (m, 2H,  $\text{CH}_2$ ), 1.86 (m, 1H,  $\text{CH}_2$ ), 1.76-1.67 (m, 3H,  $\text{CH}_2$ ).  **$^{13}\text{C}\{^1\text{H}\}$  NMR** (125 MHz,  $\text{CDCl}_3$ ):  $\delta$  = 210.4 (Ir=C), 142.5 ( $\text{CH}^4$ ), 139.4 ( $\text{CH}^1$ ), 133.3 ( $\text{CH}^2$ ), 118.1 ( $\text{CH}^3$ ), 85.1, 84.9 ( $=\text{CH}$ ), 55.9 ( $=\text{CH}$ ), 52.4 (N-Me), 50.3 ( $=\text{CH}$ ), 34.0, 33.2, 29.5, 29.4 ( $\text{CH}_2$ ).

Anal. Calcd for  $\text{C}_{14}\text{H}_{19}\text{ClIrN}$ : C, 39.20; H, 4.46; N, 3.27. Found: C, 39.4; H, 4.4; N, 3.4.

### Synthesis of 2b

A suspension of 40 mg (0.26 mmol) of 1,3-dimethyl-2-carboxypyridine and 65 mg (0.13 mmol) of  $[\text{RhCl}(\text{cod})]_2$  in 2 mL of dry THF is heated to 65° C for 2 hours. The solvent is removed *in vacuo* and the crude solid is extracted with toluene (2x2 mL). 5 mL of dry pentane are then added, the solution is filtered and the solvent removed *in vacuo* to yield a dark yellow solid. This product is further purified by crystallization from  $\text{CH}_2\text{Cl}_2$ /pentane, resulting in 59 mg of **3a** (65% yield).

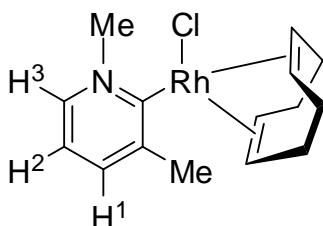

**$^1\text{H}$  NMR** (500 MHz,  $\text{CDCl}_3$ ):  $\delta$  = 7.86 (d, 1H,  $^3J_{\text{HH}} = 6.4$  Hz,  $\text{H}^3$ ), 7.16 (d, 1H,  $^3J_{\text{HH}} = 7.3$  Hz,  $\text{H}^1$ ), 6.85 (dd, 1H,  $^3J_{\text{HH}} = 6.4$  and 7.3 Hz,  $\text{H}^2$ ), 5.01 (m, 1H,  $=\text{CH}_{\text{cod}}$ ), 4.97 (m, 1H,  $=\text{CH}_{\text{cod}}$ ), 4.88 (s, 3H, N-Me), 3.12 (s, 3H, C-Me), 3.05 (m, 2H,  $=\text{CH}_{\text{cod}}$ ), 2.54-2.39 (m, 3H,  $\text{CH}_2$ ), 2.32 (m, 1H,  $\text{CH}_2$ ), 2.06-1.85 (m, 4H,  $\text{CH}_2$ ).  **$^{13}\text{C}\{^1\text{H}\}$  NMR** (125 MHz,  $\text{CDCl}_3$ ):  $\delta$  = 218.2 (d,  $^1J_{\text{RhC}} = 43$  Hz,  $\text{Rh}=\text{C}$ ), 147.7 ( $\underline{\text{C}}_{\text{q}}\text{-Me}$ ), 139.1 ( $\text{CH}^3$ ), 131.6 ( $\text{CH}^1$ ), 118.8 ( $\text{CH}^2$ ), 98.6, 98.3 (d,  $^1J_{\text{RhC}} = 6$  Hz,  $=\text{CH}$ ), 68.6, 67.8 (d,  $^1J_{\text{RhC}} = 13$  Hz,  $=\text{CH}$ ), 52.3 (N-Me), 33.2, 32.0, 29.1, 28.4 ( $\text{CH}_2$ ), 24.7 (Me).

Anal. Calcd for  $\text{C}_{15}\text{H}_{21}\text{ClIrN}$ : C, 50.94; H, 5.98; N, 3.96. Found: C, 50.7; H, 5.7; N, 3.5.

### Synthesis of 3b

A suspension of 40 mg (0.26 mmol) of N-methyl-2-carboxypyridine and 89 mg (0.13 mmol) of  $[\text{IrCl}(\text{cod})]_2$  in 2 mL of dry THF is heated to 65°C for 2 hours under inert atmosphere. The dark red solution is evaporated and the crude solid extracted with

toluene (3x 2mL). 5 mL of dry pentane are added to the toluene, the solution filtered and the solvent removed *in vacuo*, to yield a dark yellow solid which is crystallized from CH<sub>2</sub>Cl<sub>2</sub>/pentane mixtures (1:1) to yield 84 mg of **3b** (73 % yield).

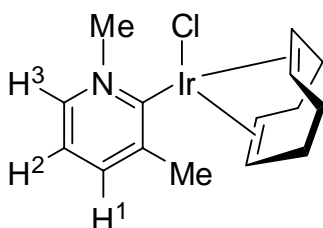

**<sup>1</sup>H NMR** (500 MHz, CDCl<sub>3</sub>): δ = 8.87 (d, 1H, <sup>3</sup>J<sub>HH</sub> = 6.4 Hz, H<sup>3</sup>), 7.28 (d, 1H, <sup>3</sup>J<sub>HH</sub> = 7.4 Hz, H<sup>1</sup>), 6.85 (dd, 1H, <sup>3</sup>J<sub>HH</sub> = 6.4 and 7.4 Hz, H<sup>2</sup>), 4.64 (s, 3H, N-Me), 4.62 (m, 1H, =CH<sub>cod</sub>), 4.54 (m, 1H, =CH<sub>cod</sub>), 2.95 (s, 3H, C-Me), 2.71 (m, 2H, =CH<sub>cod</sub>), 2.37-2.14 (m, 4H, CH<sub>2</sub>), 1.83 (m, 1H, CH<sub>2</sub>), 1.74-1.62 (m, 2H, CH<sub>2</sub>), 1.58, (m, 1H, CH<sub>2</sub>).  
**<sup>13</sup>C{<sup>1</sup>H} NMR** (125 , MHz, CDCl<sub>3</sub>): δ = 211.0 (Ir=C), 148.1 (C<sub>q</sub>-Me), 139.4 (CH<sup>3</sup>), 133.6 (CH<sup>1</sup>), 118.4 (CH<sup>2</sup>), 83.7, 83.3, 52.7, 51.8 (=CH), 51.7 (N-Me), 33.8, 32.6, 29.7, 29.1 (CH<sub>2</sub>), 24.4 (Me).

Anal. Calcd for C<sub>15</sub>H<sub>21</sub>ClIrN: C, 40.67; H, 4.78; N, 3.16. Found: C, 41.0; H, 5.1; N, 3.5.

### Synthesis of **3c**.

A solution of 40 mg (0.11 mmol) of 1-*m*-xylyl-4,6-diphenyl-2-carboxypyridine and 35 mg (0.05 mmol) of [IrCl(cod)]<sub>2</sub> in 2 mL of dry THF is heated to 65°C for 2 hours under inert atmosphere. Solvent is removed *in vacuo* and the crude solid is crystallized from a toluene/pentane mixture (1:1) to yield 40 mg of a dark yellow solid, **3c** (54% yield).

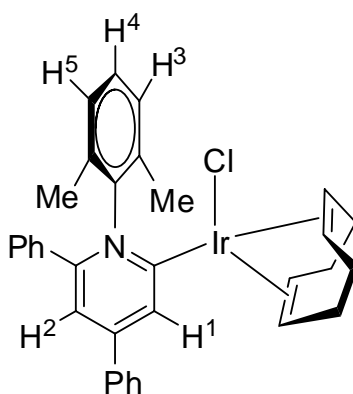

**<sup>1</sup>H NMR** (500 MHz, CDCl<sub>3</sub>): δ = 8.53 (d, 1H, <sup>4</sup>J<sub>HH</sub> = 2.3, H<sup>1</sup>), 7.82 (m, 2H, Ph), 7.51 (m, 3H, Ph), 7.28 (m, 1H, Ph), 7.22 (m, 4H, Ph), 7.19 (d, 1H, <sup>4</sup>J<sub>HH</sub> = 2.3, H<sup>2</sup>), 7.17 (m, 2H, H<sup>4</sup> and H<sup>5</sup>), 6.84 (m, 1H, H<sup>3</sup>), 4.55 (m, 1H, =CH<sub>cod</sub>), 4.29 (m, 1H, =CH<sub>cod</sub>), 3.45 (m, 1H, =CH<sub>cod</sub>), 2.59 (s, 3H, Me), 2.39 (m, 1H, CH<sub>2</sub>), 2.26 (m, 1H, =CH<sub>cod</sub>), 2.10-1.91 (m, 2H, CH<sub>2</sub>), 1.82-1.72 (m, 2H, CH<sub>2</sub>) 1.69 (s, 3H, Me), 1.29-1.19 (m, 2H, CH<sub>2</sub>), 1.00 (m,

1H, CH<sub>2</sub>). <sup>13</sup>C{<sup>1</sup>H} NMR (125, MHz, CDCl<sub>3</sub>): δ = 213.0 (Ir=C), 154.9 (C<sub>q-Ph-N</sub>), 144.5 (C<sub>q</sub>), 144.3 (C<sub>q-Xyl-N</sub>), 136.5 (C<sub>q</sub>), 136.3 (C<sub>q-Xyl</sub>), 135.7 (CH<sup>1</sup>), 134.9 (C<sub>q</sub>), 132.9 (C<sub>q-Xyl</sub>), 130.1, 129.4, 129.1 (CH<sub>Ph</sub>), 129.0, 128.9 (CH<sup>4</sup>, CH<sup>5</sup>), 128.4, 127.9, 127.7 (CH<sub>Ph</sub>), 127.2 (CH<sup>3</sup>), 119.7 (CH<sup>2</sup>) 84.6, 81.4, 56.3, 48.8 (=CH<sub>cod</sub>), 36.5, 31.5, 30.7, 26.4 (CH<sub>2</sub>), 21.5 (Me), 18.8 (Me).

Anal. Calcd for C<sub>33</sub>H<sub>33</sub>IrClN: C, 59.04; H, 4.95; N, 2.09; Found: C, 59.4; H, 4.9; N, 1.8.

### Synthesis of 4a.

A suspension of 40 mg (0.29 mmol) of N-methyl-2-carboxypyridine and 109 mg (0.29 mmol) of [PtCl<sub>2</sub>(dmsO)<sub>2</sub>] in 2 mL of dry THF is heated at 70°C for 2 hours under inert atmosphere. Solvent is removed *in vacuo* and the resulting solid washed with methanol (2x2 mL) to yield 93 mg of **4a** (60 % yield) as an off-white product.

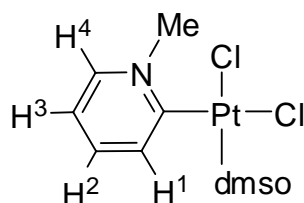

<sup>1</sup>H NMR (500 MHz, CDCl<sub>3</sub>): δ = 8.67 (d, 1H, <sup>3</sup>J<sub>HH</sub> = 6.2 Hz, H<sup>4</sup>), 8.12 (d, 1H, <sup>3</sup>J<sub>HH</sub> = 7.3 Hz, <sup>3</sup>J<sub>HPt</sub> ~ 35 Hz, H<sup>1</sup>), 7.78 (dd, 1H, <sup>3</sup>J<sub>HH</sub> = 6.2, 7.3 Hz, H<sup>2</sup>), 7.44 (dd, 1H, <sup>3</sup>J<sub>HH</sub> = 6.2, 7.3 Hz, H<sup>3</sup>), 4.54 (s, 3H, Me), 2.54 (s, 6H, dissociated dmsO). <sup>13</sup>C{<sup>1</sup>H} NMR (100 MHz, CDCl<sub>3</sub>): δ = 164.9 (Pt=C), 144.1 (CH<sup>4</sup>), 138.2 (CH<sup>2</sup>), 138.0 (CH<sup>1</sup>), 121.4 (CH<sup>3</sup>), 52.0 (N-Me), 40.5 (dissociated dmsO).

Anal. Calcd for C<sub>8</sub>H<sub>13</sub>Cl<sub>2</sub>NOPtS: C, 21.98; H, 3.00; N, 3.20. Found: C, 22.1; H, 2.7; N, 3.3.

### Synthesis of 5a

A suspension of 30 mg (0.22 mmol) of N-methyl-2-carboxypyridine and 64 mg (0.22 mmol) of [AuCl(SMe<sub>2</sub>)] in 2 mL of dry THF is heated at 70°C for 1.5 hours under inert atmosphere. Solvent is removed *in vacuo* and the resulting solid is extracted with dry CH<sub>2</sub>Cl<sub>2</sub> (5 mL). A yellow solid precipitates upon addition of 10 mL of pentane. The solution is filtered off and the yellow solid dried *in vacuo* to yield 43 mg of **4a** (59 % yield).

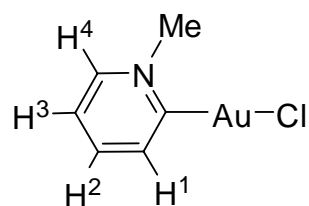

**<sup>1</sup>H NMR** (500 MHz, CDCl<sub>3</sub>): δ = 8.26 (d, 1H, <sup>3</sup>J<sub>HH</sub> = 6.4 Hz, H<sup>4</sup>), 7.98 (d, 1H, <sup>3</sup>J<sub>HH</sub> = 8.2 Hz, H<sup>1</sup>), 7.80 (dd, 1H, <sup>3</sup>J<sub>HH</sub> = 8.2 and 7.8 Hz, H<sup>2</sup>), 7.40 (dd, 1H, <sup>3</sup>J<sub>HH</sub> = 6.4 and 7.8 Hz, H<sup>3</sup>), 4.46 (s, 3H, Me). **<sup>13</sup>C{<sup>1</sup>H} NMR** (125 , MHz, CDCl<sub>3</sub>): δ = 187.6 (Au=C), 142.2 (CH<sup>4</sup>), 140.3 (CH<sup>1</sup>), 137.8 (CH<sup>2</sup>), 121.9 (CH<sup>3</sup>), 54.7 (N-Me).

Anal. Calcd for C<sub>6</sub>H<sub>7</sub>AuClN: C, 22.14; H, 2.17; N, 4.30. Found: C, 22.5; H, 2.3; N, 4.2.

### Synthesis of 5b.

A suspension of 40 mg (0.26 mmol) of 1,3-dimethyl-2-carboxypyridine and 76 mg (0.26 mmol) of [AuCl(SMe<sub>2</sub>)] in 2 mL of dry THF is heated to 70°C for 1.5 hours under inert atmosphere. Solvent is removed *in vacuo* and the resulting solid is extracted with dry CH<sub>2</sub>Cl<sub>2</sub> (5 mL). A white solid precipitates upon addition of 10 mL of pentane. The solution is filtered off and the white solid dried *in vacuo* to yield 62 mg of **5b** (70 % yield).

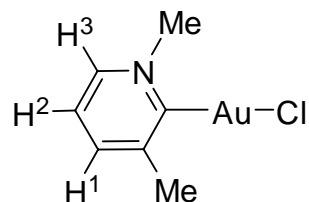

**<sup>1</sup>H NMR** (500 MHz, CDCl<sub>3</sub>): δ = 8.18 (d, 1H, <sup>3</sup>J<sub>HH</sub> = 6.4 Hz, H<sup>3</sup>), 7.78 (d, 1H, <sup>3</sup>J<sub>HH</sub> = 7.8 Hz, H<sup>1</sup>), 7.32 (dd, 1H, <sup>3</sup>J<sub>HH</sub> = 6.4 and 7.8 Hz, H<sup>2</sup>), 4.47 (s, 3H, N-Me), 2.69 (s, 3H, Me). **<sup>13</sup>C{<sup>1</sup>H} NMR** (125 , MHz, CDCl<sub>3</sub>): δ = 188.7(Au=C), 148.1 (C<sub>q</sub>), 139.4 (CH<sup>3</sup>), 137.1 (CH<sup>1</sup>), 121.5 (CH<sup>2</sup>), 54.2 (N-Me), 25.2 (Me).

Anal. Calcd for C<sub>7</sub>H<sub>9</sub>AuClN: C, 24.76; H, 2.67; N, 4.12. Found: C, 24.7; H, 2.6; N, 4.1.

### Synthesis of 6a.

CO is bubbled through a solution of **3a** (20 mg; 0.047 mmol) in 2 mL of CH<sub>2</sub>Cl<sub>2</sub>. The color changes from orange to yellow. Solvent is removed *in vacuo* and the resulting solid is washed with pentane (3x2mL) to produce **6a** quantitatively.

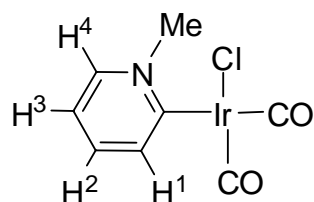

**IR (nujol):**  $\nu(\text{CO})$  2062, 1980  $\text{cm}^{-1}$ .

**$^1\text{H}$  NMR** (500 MHz,  $\text{CDCl}_3$ ):  $\delta$  = 8.21 (d, 1H,  $^3J_{\text{HH}} = 6.2$  Hz,  $\text{H}^4$ ), 8.14 (d, 1H,  $^3J_{\text{HH}} = 8.0$  Hz,  $\text{H}^1$ ), 7.74 (t, 1H,  $^3J_{\text{HH}} = 7.7$  Hz,  $\text{H}^2$ ), 7.32 (dd, 1H,  $^3J_{\text{HH}} = 6.2, 8.0$  Hz,  $\text{H}^3$ ), 4.54 (s, 3H, Me).  **$^{13}\text{C}\{^1\text{H}\}$  NMR** (125 MHz,  $\text{CDCl}_3$ ):  $\delta$  = 197.4 (Ir=C), 181.8 (CO), 169.5 (CO), 143.0 ( $\text{CH}^4$ ), 140.3 ( $\text{CH}^1$ ), 136.4 ( $\text{CH}^2$ ), 121.5 ( $\text{CH}^3$ ), 53.8 (N-Me), 28.0 (Me).  
Anal. Calcd for  $\text{C}_8\text{H}_7\text{ClIrNO}_2$ : C, 25.50; H, 1.87; N, 3.72. Found: C, 25.2; H, 2.1; N, 3.4.

### Synthesis of 6b.

This complex is prepared similarly, using 20 mg (0.045 mmol) of **3b** dissolved in 2 mL of  $\text{CH}_2\text{Cl}_2$ .

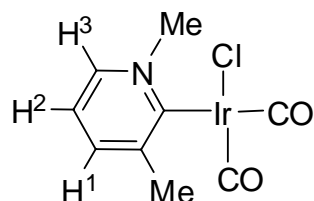

**IR (nujol):**  $\nu(\text{CO})$  2060, 1977  $\text{cm}^{-1}$ .

**$^1\text{H}$  NMR** (500 MHz,  $\text{CDCl}_3$ ):  $\delta$  = 8.08 (d, 1H,  $^3J_{\text{HH}} = 5.9$  Hz,  $\text{H}^3$ ), 7.63 (d, 1H,  $^3J_{\text{HH}} = 7.8$  Hz,  $\text{H}^1$ ), 7.25 (dd, 1H,  $^3J_{\text{HH}} = 5.9$  and 7.8 Hz,  $\text{H}^2$ ), 4.55 (s, 3H, N-Me), 2.83 (s, 3H, C-Me).  **$^{13}\text{C}\{^1\text{H}\}$  NMR** (125 MHz,  $\text{CDCl}_3$ ):  $\delta$  = 197.4 (Ir=C), 182.3, 169.0 (Ir-CO), 149.3 ( $\text{C}_q$ ), 140.4 ( $\text{CH}^3$ ), 137.2 ( $\text{CH}^1$ ), 121.6 ( $\text{CH}^2$ ), 53.6 (N-Me), 25.3 (Me).

**HRMS (EI)** Calcd for  $\text{C}_9\text{H}_9\text{NO}_2\text{ClIr}$  requires 390.9951, Found 390.9968.

### X-ray structural determination for complexes 3b and 5b:

The most relevant crystal and refinement data are collected in Tables S.1 and S.2. In both cases, crystals suitable for X-ray diffraction analysis were obtained by slow diffusion of pentane into saturated solutions of the complexes in dichloromethane. Diffraction data were recorded on a Oxford Diffraction Xcalibur Nova single crystal diffractometer, using  $\text{Cu-K}\alpha$  radiation ( $\lambda = 1.5418 \text{ \AA}$ ). Images were collected on a 65 mm fixed crystal-detector distance, using the oscillation method, with 1<sup>st</sup> oscillation and



(1.5 – 2) s variable exposure time per image. Data collection strategy was calculated with the program CrysAlis Pro CCD.<sup>7</sup> Data reduction and cell refinement was performed with the program CrysAlis Pro RED.<sup>7</sup> An empirical absorption correction was applied using the SCALE3 ABSPACK algorithm as implemented in the program CrysAlis Pro RED.<sup>7</sup> In all cases the software package WINGX<sup>8</sup> was used for space group determination, structure solution and refinement. The structure for the complex **3b** was solved by direct methods using SIR2004<sup>9</sup> and **5b** by Patterson interpretation and phase expansion using DIRDIF.<sup>10</sup> Isotropic least-squares refinement on  $F^2$  using SHELXL97<sup>11</sup> was performed. During the final stages of the refinements, all the positional parameters and the anisotropic temperature factors of all the non-H atoms were refined. The H atoms were geometrically located and their coordinates were refined riding on their parent atoms. The function minimized was  $([\sum w F_o^2 - F_c^2]/\sum w(F_o^2))^{1/2}$  where  $w = 1/[\sigma^2(F_o^2) + (aP)^2 + bP]$  (for **3b**,  $a = 0.0389$ ,  $b = 3.9074$  and for **5b**,  $a = 0.0777$ ,  $b = 3.5800$ ) with  $\sigma(F_o^2)$  from counting statistics and  $P = (\text{Max}(F_o^2, 0) + 2F_c^2)/3$ . Atomic scattering factors were taken from the International Tables for X-Ray Crystallography International.<sup>12</sup> Geometrical calculations were made with PARST.<sup>13</sup>

---

<sup>7</sup> CrysAlis<sup>Pro</sup> CCD, CrysAlis<sup>Pro</sup> RED. Oxford Diffraction Ltd., Abingdon, Oxfordshire, UK. (2008).

<sup>8</sup> L.J. Farrugia, *J. Appl. Crystallogr.*, 1999, **32**, 837.

<sup>9</sup> M. C. Burla, R. Caliandro, M. Camalli, B. Carrozzini, G. L. Cascarano, L. De Caro, C. Giacovazzo, G. Polidori and R. Spagna, *J. Appl. Cryst.*, 2005, **38**, 381.

<sup>10</sup> P. T. Beurskens, G. Admiraal, G. Beurskens, W. P. Bosman, S. García-Granda, R. O. Gould, J. M. M. Smits and C. Smykalla, *The DIRDIF Program System*, Technical Report of the Crystallographic Laboratory, University of Nijmegen, Nijmegen, The Netherlands, 1999.

<sup>11</sup> G. M. Sheldrick, *SHELXL97: Program for the Refinement of Crystal Structures*; University of Göttingen: Göttingen, Germany, 1997.

<sup>12</sup> *Tables for X-Ray Crystallography*; Kynoch Press, Birmingham, U.K., (1974); Vol. IV (present distributor: Kluwer Academic Publishers; Dordrecht, The Netherlands).

<sup>13</sup> M. Nardelli, *Comput. Chem.*, 1983, **7**, 95.

**3. Table S.1.** Crystal data and structure refinement for **3b**.

|                                   |                                             |                              |
|-----------------------------------|---------------------------------------------|------------------------------|
| Identification code               | mrm142b                                     |                              |
| Empirical formula                 | C15 H21 Cl Ir N                             |                              |
| Formula weight                    | 442.98                                      |                              |
| Temperature                       | 293(2) K                                    |                              |
| Wavelength                        | 1.54180 Å                                   |                              |
| Crystal system                    | Monoclinic                                  |                              |
| Space group                       | P 21/c                                      |                              |
| Unit cell dimensions              | a = 10.2207(2) Å                            | $\alpha = 90^\circ$ .        |
|                                   | b = 11.3062(1) Å                            | $\beta = 110.736(2)^\circ$ . |
|                                   | c = 13.6376(2) Å                            | $\gamma = 90^\circ$ .        |
| Volume                            | 1473.84(4) Å <sup>3</sup>                   |                              |
| Z                                 | 4                                           |                              |
| Density (calculated)              | 1.996 Mg/m <sup>3</sup>                     |                              |
| Absorption coefficient            | 19.046 mm <sup>-1</sup>                     |                              |
| F(000)                            | 848                                         |                              |
| Crystal size                      | 0.037 x 0.098 x 0.137 mm <sup>3</sup>       |                              |
| Theta range for data collection   | 4.63 to 74.36°.                             |                              |
| Index ranges                      | -12<=h<=11, -14<=k<=10, -16<=l<=15          |                              |
| Reflections collected             | 6182                                        |                              |
| Independent reflections           | 2913 [R(int) = 0.0219]                      |                              |
| Completeness to theta = 74.36°    | 97.2 %                                      |                              |
| Refinement method                 | Full-matrix least-squares on F <sup>2</sup> |                              |
| Data / restraints / parameters    | 2913 / 0 / 165                              |                              |
| Goodness-of-fit on F <sup>2</sup> | 1.142                                       |                              |
| Final R indices [I>2sigma(I)]     | R1 = 0.0277, wR2 = 0.0696                   |                              |
| R indices (all data)              | R1 = 0.0332, wR2 = 0.0831                   |                              |
| Largest diff. peak and hole       | 0.711 and -1.289 e.Å <sup>-3</sup>          |                              |

**4. Table S.2.** Crystal data and structure refinement for **5b**.

|                                   |                                             |                       |
|-----------------------------------|---------------------------------------------|-----------------------|
| Identification code               | mrm173sp                                    |                       |
| Empirical formula                 | C7 H9 Au Cl N                               |                       |
| Formula weight                    | 339.57                                      |                       |
| Temperature                       | 100(2) K                                    |                       |
| Wavelength                        | 1.5418 Å                                    |                       |
| Crystal system                    | orthorhombic                                |                       |
| Space group                       | P bca                                       |                       |
| Unit cell dimensions              | a = 7.1822(2) Å                             | $\alpha = 90^\circ$ . |
|                                   | b = 14.0369(3) Å                            | $\beta = 90^\circ$ .  |
|                                   | c = 16.6733(3) Å                            | $\gamma = 90^\circ$ . |
| Volume                            | 1680.93(7) Å <sup>3</sup>                   |                       |
| Z                                 | 8                                           |                       |
| Density (calculated)              | 2.684 Mg/m <sup>3</sup>                     |                       |
| Absorption coefficient            | 35.194 mm <sup>-1</sup>                     |                       |
| F(000)                            | 1232                                        |                       |
| Crystal size                      | 0.093 x 0.046 x 0.019 mm <sup>3</sup>       |                       |
| Theta range for data collection   | 5.31 to 73.89°.                             |                       |
| Index ranges                      | -6<=h<=8, -17<=k<=17, -20<=l<=20            |                       |
| Reflections collected             | 8548                                        |                       |
| Independent reflections           | 1698 [R(int) = 0.0556]                      |                       |
| Completeness to theta = 73.89°    | 99.6 %                                      |                       |
| Refinement method                 | Full-matrix least-squares on F <sup>2</sup> |                       |
| Data / restraints / parameters    | 1698 / 0 / 93                               |                       |
| Goodness-of-fit on F <sup>2</sup> | 1.116                                       |                       |
| Final R indices [I>2sigma(I)]     | R1 = 0.0398, wR2 = 0.1090                   |                       |
| R indices (all data)              | R1 = 0.0444, wR2 = 0.1130                   |                       |
| Largest diff. peak and hole       | 2.455 and -1.837 e.Å <sup>-3</sup>          |                       |
